# 1 Cell density-dependent death triggered by viral palindromic DNA sequences

2 William P Robins<sup>1\*</sup>, Bradley T Meader<sup>1</sup>, Jonida Toska<sup>1</sup>, and John J Mekalanos<sup>1\*</sup>

3 <sup>1</sup>Department of Microbiology, Harvard Medical School, 77 Avenue Louis Pasteur, Boston, MA  
4 02115

5 \*Corresponding authors

6 E-mail: [william\\_robins@hms.harvard.edu](mailto:william_robins@hms.harvard.edu) and [john\\_mekalanos@hms.harvard.edu](mailto:john_mekalanos@hms.harvard.edu)

7 Defense systems that recognize viruses have provided not only the tools of molecular  
8 biology but also important insights into other mechanisms that can induce immunity to these or  
9 other infectious agents including transmissible plasmids and chromosomal genetic elements.  
10 Several systems that trigger cell death upon viral infection have recently been recognized but the  
11 signals that activate these abortive infection systems remain largely unknown. Here we  
12 characterize one such system in *Vibrio cholerae* that we found was responsible for triggering cell-  
13 density dependent death (CDD) of bacterial cells in response to the presence of certain genetic  
14 elements. The key components of the CDD system include quorum-regulated components  
15 DdmABC and the host factor PriA. Our analysis indicates that the plasmid and phage signals that  
16 trigger CDD were palindromic DNA sequences that are predicted to form stem-loop hairpin  
17 structures from single-stranded DNA during stalled replication. Our results further suggest that  
18 other agents that generate damaged DNA can also trigger DdmABC/PriA activation and cell death  
19 probably through activation of a nuclease domain present in the DdmA protein. Thus, any  
20 infectious process that results in damaged DNA, particularly during DNA replication, can in theory  
21 trigger cell death through the DdmABC/PriA abortive infection system.

## 22 Introduction

23 Anti-viral defense systems have a long history of identification in prokaryotic systems  
24 through both bacteriophage and bacterial genetics <sup>1</sup>. Many of these antiphage systems have been  
25 recently recognized to have eukaryotic counterparts that function in viral defense <sup>2,3</sup>. Recent  
26 advances in genomics and bioinformatics have facilitated the prediction of numerous putative  
27 antiphage systems that have uncharacterized mechanisms of action <sup>4</sup>. The genes for these antiphage  
28 systems are often found positioned together on mobile genetic elements that were likely

29 horizontally transferred between bacterial strains<sup>5</sup>. Frequently, these anti-phage systems have been  
30 experimentally shown to function in *Escherichia coli*<sup>6–8</sup>, however, the signals that allow such  
31 systems to recognize phage-infected bacterial cells remain ill-defined.

32 Phages are the most abundant biological entities on planet Earth and are predicted to  
33 outnumber bacteria by a factor of 10-fold<sup>9</sup>. Given this continuous predation, bacteria have evolved  
34 antiphage systems and, in turn, phages have evolved escape strategies for these formidable  
35 defenses. Together these define an enormous 'arms race' that shapes microbial ecology in all  
36 inhabited environments<sup>10–12</sup>. It is important to note that understanding how anti-phage defense  
37 systems work at a mechanistic level has provided numerous technological tools that now shape  
38 and drive biomedical and bioscience innovations<sup>13,14</sup>

39 Phage and mobile elements in bacterial pathogens are also highly relevant to diseases that  
40 include the lethal diarrheal syndrome called cholera<sup>15,16</sup>. For pathogenic *Vibrio cholerae*, the  
41 acquisition and chromosomal integration of the genome of the filamentous phage (CTX- $\phi$ )  
42 encoding cholera toxin was clearly a prerequisite for the emergence of strains responsible for all  
43 seven recognized cholera pandemics<sup>17</sup>. However, the process that leads to the acquisition of CTX-  
44  $\phi$  involves multiple phage-like elements and a chromosomal island that encodes the Toxin-Co-  
45 regulated Pilus (TCP) which serves as both the receptor for the phage as well as a critical human  
46 intestinal colonization factor<sup>17–20</sup>.

47 All pandemic strains of *V. cholerae* are genetically similar and classified as either Classical  
48 or El Tor biotypes<sup>21</sup>. Classical strains are believed to be responsible for the first six pandemics  
49 and separate waves of El Tors variants account for the current ongoing 7th pandemic<sup>15,16,22–24</sup>.  
50 Other genetically distinct strains have acquired both TCP and CTX- $\phi$  but these strains are not  
51 responsible for widespread epidemics<sup>25–27</sup>. Thus, the unique repertoire of genetic elements in the  
52 7th pandemic El Tor strains is believed to contribute to the fitness of this dominant pandemic clade  
53 of *V. cholerae* that emerged with the subsequent elimination of Classical strains as the cause of  
54 cholera worldwide<sup>16,28</sup>.

55 *V. cholerae* has been documented to be subject to phage predation that correlates with the  
56 collapse of cholera epidemics and this observation is postulated to be a factor in the emergence of  
57 the 7th pandemic clade<sup>29–32</sup>. These observations have prompted many studies on phage resistance

58 mechanisms in *V. cholerae*, as well as phage-encoded countermeasures that block some anti-phage  
59 systems<sup>33,34</sup>. For example, quorum sensing regulation mediated by autoinducers, molecules that  
60 accumulate typically under high-density growth conditions, was reported to promote phage  
61 resistance in 7th pandemic *V. cholerae* strains by an unclear mechanism<sup>35</sup>.

62 All contemporary pathogenic *V. cholerae* strains have acquired two chromosomal islands  
63 termed the *Vibrio* 7th Pandemic Islands I (VSP-1) and II (VSP-2)<sup>28</sup>. Gene products encoded by  
64 both islands have recently been shown to be capable of restricting phage growth and plasmid  
65 persistence by mechanisms including programmed cell death of infected cells<sup>7,6,8,36</sup>. These  
66 conclusions have been largely reached based on the over-expression of VSP-1 or VSP-2 genes in  
67 the surrogate bacterial species *E. coli*. More recently, quorum-regulated VSP-2 genes in the  
68 *DdmABC* operon have been demonstrated to inhibit the growth of some vibriophages by 2-3 logs  
69 but only when co-absent with specific VSP-1 putative antiphage genes<sup>36</sup>. Importantly, the signals  
70 that activate any anti-phage and anti-plasmid defense system in *V. cholerae* remain ill-defined.

71 To discover the signals that activate these defense systems in *V. cholerae*, we analyzed a  
72 laboratory plasmid and two phages we identified that were specifically restricted in growth by  
73 VSP-2 genes *DdmABC* that belong to the Lamassu-like antiphage system<sup>4</sup>. When maintained by  
74 drug selection, the transformed plasmid remarkably caused bacterial death only at high cell density  
75 and in a VSP-2-dependent manner. Using genetic approaches, we identified the cell-death-  
76 inducing signal as a sequence in the plasmid that is predicted to form a single-stranded DNA stem  
77 loop (or hairpin). We cloned sequences from vibriophages that were similarly toxic and dependent  
78 on VSP-2 and found that all were palindromic and predicted to form stem-loop hairpin structures.  
79 Additional VSP-2 mutations that could suppress the high-density dependent, hairpin-triggered cell  
80 death response mapped to the quorum-regulated *DdmABC* operon as well as a gene product (PriA)  
81 that recognizes stalled DNA replication forks. DNA-damaging agents also triggered higher levels  
82 of cell death dependent on VSP-2, *DdmABC*, and PriA function. We present a model for how  
83 phage infection is detected by the *DdmABC*/PriA system and how that recognition likely triggers  
84 cell death through the activation of a nuclease domain encoded by the *DdmA* protein. If correct,  
85 this model predicts that the *DdmABC*/PriA system can detect not only phages and plasmids that  
86 encode palindromes which likely damage DNA during replication but also viral and host processes  
87 that cause chromosomal or viral DNA degradation.

## 88 Results

### 89 Identification of a sequence in a plasmid that triggers *V. cholerae* cell death

90 El Tor 7th pandemic strains of *V. cholerae* have been reported to inhibit the maintenance  
91 of certain plasmids<sup>8</sup>. To independently confirm this observation, we attempted to transform a  
92 plasmid pWR1566 that encodes LacZ and ampicillin (Amp) resistance into a *lacZ* mutant of a 7th  
93 pandemic El Tor *V. cholerae* strain (WPR2700). LacZ expression was monitored with the  
94 colorimetric substrate Bromo-4-Chloro-3-Indolyl- $\beta$ -d-Galactopyranoside (XGAL) which forms a  
95 dark blue product when hydrolyzed by LacZ. Although LacZ expression was observed in Amp-  
96 selected transformants, colonies grew poorly and released copious amounts of LacZ as indicated  
97 by the appearance of the dark blue halos around colonies. These results suggested that cell death  
98 and lysis were occurring; a phenomenon previously described as “blue ghosts” in *E. coli*<sup>37</sup> (**Figure**  
99 **1a**). Surprisingly, WPR2700 cells carrying the plasmid grew well in liquid media containing Amp,  
100 but when those high-density cultures were plated on agar containing Amp, we observed cell death  
101 that was most apparent where cells were present at high density; accordingly, we called this  
102 phenomenon, cell density-dependent death (CDD) (**Figure 1b**).

103 Because CDD occurred only at high cell density on a solid surface, we reasoned this may  
104 be due to quorum sensing as well as recognition of a signal present on the plasmid that triggered  
105 cell death. To isolate mutants resistant to the CDD signal, plasmid-transformed WPR2700 cells  
106 were spotted at high density on agar containing Amp and XGAL. While most cells died, we did  
107 observe exceedingly rare white colonies that arose at a frequency of approximately  $10^{-7}$ . Because  
108 the majority of these Amp<sup>r</sup> clones no longer produced LacZ, we predicted that plasmid sequence  
109 deletions had occurred and indeed sequencing of the purified mutant plasmids revealed deletions  
110 that removed a common 5' region upstream of the *lacZ* gene (**Figure 1c**). Curiously, the formation  
111 of these deletions had not been generated between short homologous sequences as previously  
112 observed as the most common mechanism for deletion formation<sup>38</sup> (**Supplemental Figure 1**). We  
113 reasoned that this deleted region must encode a *cis*-acting sequence that induces CDD.  
114 Examination of deleted sequences revealed a 79 nucleotide plasmid sequence originally derived  
115 from the primary replication origin of *E. coli* bacteriophage T7 including an intact annotated  
116 RNase-III site (**Figure 1cd**). These sequences form hairpins as dsRNA and then are processed by

117 RNases to regulate transcript stability and gene expression<sup>39</sup>. There is no known role for these  
118 secondary structures in DNA, though they are energetically favored to form in single-stranded  
119 nucleic acid sequences including DNA because of their palindromic nature. Plasmids lacking this  
120 sequence due to a deletion or related plasmids that lacked this same T7-derived sequence but  
121 carried LacZ did not induce CDD.

## 122 **Identification of *V. cholerae* suppressors of CDD**

123 Using the same selective approach, we identified *V. cholerae* chromosomal mutants that  
124 could maintain and replicate pWPR1566 and grow as healthy blue colonies on agar containing  
125 Amp and XGAL. Next-generation sequencing of each of these mutants was used to identify CDD  
126 suppressor alleles in the *V. cholerae* chromosomal genome and also estimate the copy number of  
127 pWR1566 through the level of reads that mapped to the plasmid. Of 24 mapped suppressor  
128 mutations in blue colonies that were chromosomal, five were found to affect plasmid copy number  
129 based on mapping depth (**Table 1**). All five mutations decreased plasmid copy 8-20 fold and four  
130 mutations were located in the gene encoding PcnB (PAP-I), a protein known to decrease the copy  
131 number of plasmids with a pCol-E1 type replicon, including our vector (Lopilato et al., 1986; He  
132 et al., 1993); the fifth mutation was in *priA*, a gene encoding the PriA primosome and replication  
133 restart protein also essential for replication of pCol-E1 plasmids<sup>40</sup>. This result suggested the  
134 reduction in plasmid-encoded signal permitted survival. A majority (18 of 24) of the suppressor  
135 mutations mapped to three adjacent genes in VSP-2 island that encode the *DdmABC* operon<sup>8</sup>.  
136 These include missense, nonsense, frameshifts, deletions, and insertions. Thus, we speculated that  
137 the DdmC proteins were part of the DDC system responsible for the plasmid-induced cell death  
138 that was triggered by growth at high cell density. Other suppressor alleles independent of *DdmABC*  
139 and *PcnB* included a mutation in *luxO* (**Table 1**); the *luxO* mutation is consistent with the  
140 observation that the DdMABC operon is quorum-regulated<sup>36</sup>.

## 141 **Predicted structures and functions of VSP-II proteins**

142 By homology alone, DdmABC belongs to the Lamassu antiphage system (**Figure 2cd**)<sup>4</sup>.  
143 Hidden Markov Model and both our and previous *in silico* structural analyses identified a  
144 conserved CAP4 nuclease domain in DdmA that is also present in a CBASS antiphage nuclease  
145 effector protein that requires a cyclic tri oligonucleotide for its activation by binding a domain

146 called SAVED<sup>8,36,41</sup>; however, DdmA does not have a SAVED domain but instead a C-terminal  
147 Domain 7 motif (Pfam CDT7) belonging to ABC-three component (ABC-3C) systems. DdmB is  
148 predicted to be a small globular protein with no predicted homologs with known functions but  
149 does possess an ABC-three component system Middle Component motif (Pfam MC3). We  
150 detected a strong predicted structural similarity between DdmC and the eukaryotic Rad50 and  
151 bacterial SbcC-like proteins (**Supplemental Figure 2**). Features found in other Rad50/SbcC-like  
152 proteins (a conserved Walker A and an atypical Walker B NTP-binding motif) were independently  
153 verified as in previous work<sup>8</sup>, and identified in each of the head domains at the N- and C-termini  
154 of DdmC, respectively. The three proteins encoded by the *DdmABC* operon closely resemble other  
155 members of the recently identified ABC-3C (ABC-three component) complex (**Figure 2e**). These  
156 are defined by a toxic effector enzyme that attacks an essential cellular process when partner  
157 proteins in the complex recognize signals such as those presented by an invading DNA virus<sup>42</sup>.

158 We mapped the CDD suppressor mutations in the *DdmABC* operon and compared their  
159 positions to the predicted structures using ColabFold<sup>43</sup>. All mutations in *ddmA* were either  
160 insertion, missense, deletions, frameshift, or premature stop codons indicating that DdmA loss of  
161 function was the most likely cause of CDD suppression. All *ddmB* mutations were either frameshift  
162 or stop codons also suggesting loss of function. For *ddmC*, most mutations were clustered in the  
163 two predicted head domains and included premature stop codons, frameshift, and missense  
164 mutations. The DdmC F571C mutation was notably proximal to the predicted Walker B motif at  
165 AA 560-565. Because of the limited scope of this genetic selection, we did not expect to identify  
166 precise mutations in all domains essential for DdmABC activity such as key residues within the  
167 DdmA nuclease domain.

## 168 **Identification of VSP-2 restricted phages and phage-associated signals that trigger CDD**

169 We further reasoned that CDD may represent a response usually associated with aborted  
170 phage infection triggered by DNA sequences such as the T7 phage-derived hairpin/T7 Rnase-III  
171 site we identified in pWR1566 and that these sites might be recognized by DdmABC and perhaps  
172 PriA if such sequences also stall DNA replication processes. To test this hypothesis, we screened  
173 48 vibriophage samples in our collection using both WT and a constructed VSP-2 deletion mutant  
174 ( $\Delta$ VSP-2) to identify those that were restricted by VSP-2. Two vibriophages (VIB04 and VIB05)

175 were identified as being restricted and both plated as clear large plaques at least 10 million fold  
176 better on a confluent lawn of the WR2700 $\Delta$ VSP-2 strain (**Table 1**). The genome sequence of the  
177 two vibriophages revealed that VIB04 is highly similar to coliphage T7/T3-like viruses and VIB05  
178 to the Tawavirus genera. Both are related and taxonomically assigned within the Autographiviridae  
179 family with other similar phages that encode a self-transcribing RNA polymerase<sup>44</sup>. We were  
180 unable to isolate spontaneous mutants in either phage that overcame apparent VSP-2 restriction  
181 using high titer cesium-purified stocks with concentrations exceeding  $\sim 10^9$  PFU/ml.

182 We reasoned one or more DNA signals such as palindromic sequences must exist in both  
183 these phages that are restricted by VSP-2 and that these may be essential for phage replication. To  
184 screen for such sequences in phage, we chose to focus on phage VIB04 and sheared purified DNA  
185 to 400-600 nucleotides and constructed random shotgun libraries cloned into our LacZ<sup>+</sup> screening  
186 vector (pWR1566) while removing the T7-based palindromic sequence which we showed to  
187 trigger CDD in a VSP-2-dependent fashion. Liquid cultures of *V. cholerae* carrying these libraries  
188 were plated and colonies that displayed the 'blue ghost' CDD death phenotype were identified in a  
189 small fraction of each shotgun library; plasmids recovered from these colonies were then  
190 sequenced. Cloned sequences from VIB04 that induced the blue ghost death phenotype were  
191 interspersed across the entire genomes. Many possess high similarities to one another and all  
192 encode palindromic sequences that would form hairpins in single strands of DNA and some of  
193 these were highly similar to the Rnase-III site in T7 originally identified in plasmid pWR1566  
194 (**Figure 3, Supplemental Figure S3**). Furthermore, these phage-encoded palindromic sequences  
195 displayed no toxicity when introduced into *ddmABC* or *priA* mutant strains that suppress CDD.

## 196 **Role of VSP-2 independent suppressors including PriA**

197 We plated both VSP-2 restricted phage VIB04 on the entire set of selected and sequenced  
198 *V. cholerae* chromosomal suppressors of CDD to determine if the suppressors obtained by our  
199 pWR1566 plasmid selection also permitted phage growth. Some VSP-2 and non-VSP-2  
200 suppressors permitted a significant increase in the titer of phage VIB04 (**Table 1**). Mutations in  
201 *pcnB* that reduced the copy number of pWR1566 displayed low phage titers that were similar to  
202 WT indicating that PcnB mutations did not interfere with the ability of VSP-2 gene products to  
203 block VIB04 replication. In contrast, strains with a single missense mutation present in *priA*

204 permitted titers of phage as high as those seen in  $\Delta VSP-2$ . Although PriA is also required for the  
205 replication of plasmids possessing a ColE1 origin of replication<sup>40</sup> the ability of a PriA mutation  
206 to alleviate VSP-2-dependent phage restriction suggests it plays a more critical role in CDD. The  
207 phage titers for strains carrying frameshift *ddmC Asp523Tyr* and *Phe571Cys* missense mutations  
208 are significantly more permissive for phage replication than most other *ddmABC* mutations. This  
209 indicated that many of the plasmid-selected mutations including premature stop or frameshifts  
210 were likely not completely inactivating their respective proteins. However, mutations in the DdmC  
211 C-terminus appear to be the most inhibitory regarding both plasmid and phage restriction. Thus,  
212 components of the DdmABC system together with PriA are likely critical components of the CDD  
213 system but some protein domains identified in our plasmid-based selection appeared to be more  
214 essential for phage restriction.

215 Orthologues of the PriA protein in other bacteria recognize stalled replication forks and  
216 DNA hairpin sequences during replication restart<sup>45-48</sup>. The *priA M462R* CDD suppressor mutation  
217 we isolated is positioned within a highly-conserved domain that contains a  $\beta$ -hairpin/strand-  
218 separation 'pin element' that is located in a zinc-binding pocket that is conserved in RecQ helicases  
219<sup>48</sup> (**Figure 2a**). Mutations within this pin element reportedly eliminate PriA-mediated DNA  
220 unwinding, function, and interactions with primosome protein PriB<sup>48</sup>. We examined the function  
221 of the *priA M462R* in VSP-2 phage restriction by comparing the titers of phage plated on lawns of  
222 *V. cholerae* strain carrying the *priA M462R* mutation (**Table 1**). The higher titers of VIB04 on  
223 these mutants compared to the low titers on WT support the importance of PriA and its  $\beta$ -  
224 hairpin/strand-separation pin element in phage restriction by the CDD system and suggest that  
225 PriA may directly recognize critical DNA structures or protein complexes triggered by hairpin  
226 sequences. We were unable to construct complete *priA* deletions mutants to compare to the *priA*  
227 *M462R*. In *E.coli*, *priA* disruption mutants are constitutively SOS-induced, have poor viability,  
228 and form filamentous cells<sup>49-51</sup>. Because *E.coli priA* null mutants are unable to maintain ColE1  
229 replicon plasmids<sup>40</sup>, and we measured a reduction in plasmid copy number for this mutant in *V.*  
230 *cholerae*, we hypothesize *priA M462R* is impaired in its activity rather than inactive in *V. cholerae*.

231

232



## 233 **Mutations in a hairpin encoding palindromic sequence abrogate CDD**

234 To more precisely examine the role of palindromic sequences that might encode ssDNA  
235 hairpins, we inserted a minimal short synthetic oligonucleotide that encodes an RNase III-like  
236 sequence derived from VIBO4 phage into a vector devoid of a T7 RNase III sites. This VIBO4  
237 palindrome was designated Seq2 and was compared with an oligonucleotide that was mutated at  
238 several nucleotides predicted to disrupt base pair interactions that could drive hairpin formation  
239 (designated Seq2-mut3). The two cloned palindromic sequences were then used to evaluate CDD  
240 in the context of VSP-2 (**Figure 4abcd**). Plasmid constructs were transformed into cells, grown to  
241 stationary phase in broth, and then plated at high density on agar for 12 hrs; this is our standard  
242 CDD assay in all work reported here. We found that the Seq2 sequence was highly toxic in the  
243 CDD assay and comparable to the original T7 RNase-III sequence we identified in pWR1566. In  
244 contrast, the Seq2-mut3 encoding plasmid was ~25-fold more permissive for the recovery of viable  
245 cells; this was comparable to the improved viability of  $\Delta VSP-2$  strains on agar that carry a Seq2-  
246 encoding plasmid (**Figure 4d**). The phage-encoded Seq2 was just as toxic when cloned in forward  
247 and reverse orientations suggesting it is not mRNA hairpins that are triggering CDD. We conclude  
248 that one CDD signal must include palindromic sequences that can form hairpins in ssDNA or  
249 disruption of DNA replication.

## 250 **CDD causes phage restriction and abortive infection**

251 We characterized the role of VSP-2 in restricting the growth of vibriophage VIB04 in both  
252 high-density liquid cultures and when spotted on agar surfaces. We measured phage adsorption  
253 and growth in WT and a  $\Delta VSP-2$  strain to establish phage infectivity growth parameters as well as  
254 the effects of VSP-2 on cell viability. When both strains are infected in liquid culture at a low  
255 multiplicity of infection but high cell density, only the  $\Delta VSP-2$  mutant strain continues to produce  
256 infectious particles (**Figure 5a**). In contrast, WT strains incubated with phage continue to reduce  
257 the number of infectious particles over time. After 150 minutes,  $\Delta VSP-2$  had nearly 100,000-fold  
258 more PFUs present in supernatant fluids than WT. Cells carrying VSP-2 failed to produce an  
259 increase in infectious phage when compared to the  $\Delta VSP-2$  strain.

260 We surmised WT cells are also infected and fail to produce phage but did not know whether  
261 infected cells are killed by an abortive infection mechanism or instead only restrict phage growth  
262 but remain viable. To simultaneously measure the production of phage (PFUs) and viability of  
263 bacteria (CFUs), we infected cells to allow phage to adsorb and then collected the cells and plated  
264 these as a concentrated spot to mimic conditions that induced plasmid-dependent CDD. Relative  
265 to the wild type, the  $\Delta VSP-2$  mutant grew to a higher density after 4-6 hours in the absence of  
266 phage, but CFU recovery was modestly reduced when phage-infected (**Figure 5b**). The difference  
267 in the production of phage indicated by an increase in PFU was highly significant between WT  
268 and the  $\Delta VSP-2$  mutant (**Figure 5c**). Consistent with our measurements in liquid growth, only *V.*  
269 *cholerae*  $\Delta VSP-2$  mutants are successfully infected and continue to produce infectious particles.  
270 At high plating density, both the number of WT and  $\Delta VSP-2$  mutant cells were found to decrease.  
271 Thus, it is likely that phage infection, though DdmABC-restricted, can induce cell death of the WT  
272 strain through DDC abortive infection in contrast to killing the  $\Delta VSP-2$  mutant through viral  
273 replication in these phage-permissive cells.

#### 274 **Sensitivity to DNA damaging agents**

275 Our data indicate that the *cis*-acting palindromic sequences in both phage and plasmid  
276 DNA are lethal signals to bacteria in both a DdmABC and PriA-dependent manner. How cell death  
277 is triggered likely involves activation of the CAP4 nuclease CAP4 domain in DdmA because a  
278 defective nuclease mutant was previously demonstrated to abolish plasmid elimination that  
279 depended on *ddmABC*<sup>8</sup>. The significant hairpin-forming structures identified as CDD-inducing  
280 signals may stall replication forks that then recruit PriA as suggested in earlier studies<sup>45,48,52</sup>. We  
281 hypothesized that DNA damage may induce similar DNA repair responses that require PriA and  
282 could trigger CDD. Therefore we tested WT and CDD-defective strains for differences in their  
283 sensitivity to various mutagens and bactericidal agents that target DNA replication. We found that  
284 at a range of ultraviolet radiation doses, both single and double  $\Delta VSP-2$  and *priA Met462Arg*  
285 mutants showed much better growth and survival than their WT parental strain (**Figure 6**). At  
286 doses above 48 joules/cm<sup>2</sup>, only strains with either or both  $\Delta VSP-2$  and *priA* mutations were  
287 recovered. We measured the sensitivity of  $\Delta VSP-2$  and *priA* mutants to the DNA alkylating agent  
288 methyl methane sulfonate (MMS), nalidixic acid (which reversibly binds and inhibits both the

289 ligation activity of DNA gyrase and Topoisomerase IV resulting in dsDNA breaks<sup>53,54</sup>), and  
290 Mitomycin C (which introduces crosslinks between bases and dsDNA breaks that require PriA-  
291 dependent repair<sup>55,56</sup>). When compared to  $\Delta VSP-2$  and *priA* mutants, the WT strain was  
292 significantly more sensitive to the lethal actions of MMS, nalidixic acid, and Mitomycin C (**Figure**  
293 **6**). Thus the same gene products that are essential for CDD also hyper-sensitize *V. cholerae* to  
294 agents that cause DNA damage.

## 295 **Discussion**

296 We show the Lamassu system of *V. cholerae* encoded by *DdmABC* of VSP-2 genomic  
297 island restricts some vibriophages by recognizing a signal associated with phage-encoded  
298 palindromic DNA sequences. This signal-induced cell density-dependent death (CDD) is  
299 dependent on the quorum-regulated *DdmABC* operon of VSP-2<sup>36</sup>. The signal was first identified  
300 in a laboratory plasmid vector as a coliphage T7-derived phage sequence. However, palindromic  
301 sequences present in two different vibriophages were also recognized by the gene products we  
302 identified as being required for VSP-2 phage restriction. CDD triggered by one of these  
303 palindromic sequences could be abolished by only three nucleotide substitutions that are predicted  
304 to disrupt the DNA hairpin it can form.

305 Based on these predictions, we hypothesize the DdmA nuclease effector is activated by a  
306 signal recognized in part by its DdmC and DdmB partner proteins and also possibly PriA.  
307 Critically, proteins that resemble DdmC and other structural maintenance of chromosome (SMC)  
308 proteins often play essential roles in DNA tethering, repair, replication, and recombination, usually  
309 as dimers associated with larger multimeric complexes<sup>57,58</sup>. SMC-like proteins possess ATP and  
310 nucleotide-binding domains as well as an extended coil-coil domain capped by a dimerization  
311 domain<sup>59-61</sup>. One of the best studied, DNA repair protein Rad50, also forms MRe11/NSB1  
312 complexes that respond to viral invasion in eukaryotic cells and specifically recognize DNA  
313 double-stranded breaks (DSBs) and stalled replication forks<sup>62</sup>. SMC bacterial repair protein SbcC  
314 forms a complex with its nuclease partner SbcD to recognize and cleave palindromic sequences  
315 that can form hairpins during DNA replication<sup>63,64</sup>. Palindromic sites cause genomic instability  
316 and have been shown to induce single and double-stranded breaks via SbcCD recognition; DSB  
317 repair typically requires RecBCD recombination and the re-established replication fork protein

318 PriA<sup>65</sup>. Thus, the identified suppressors mapping to DdmABC and PriA suggest that the signal  
319 that triggers CDD may involve DNA lesions, breaks, and stalled replication forks induced by  
320 palindromic sequences. Although DdmABC proteins can resemble others that help coordinate  
321 DNA repair, recombination, replication, and maintain chromosomal stability, our results suggest  
322 that the *V. cholerae* DdmABC/PriA system instead acts to block replication of foreign DNA by  
323 recognizing DNA damage induced by these foreign genetic elements. The foreign DNA is likely  
324 not selectively destroyed but rather CDD triggers an abortive infection that eliminates both the  
325 infected cell and the viral or plasmid element that has invaded the cell before it has had a chance  
326 to amplify and infect other cells. This is most vividly demonstrated by the profound bacterial cell  
327 death that occurs when cells carrying plasmids that encode phage-derived palindromic sequences  
328 are plated at high density on agar. (**Figure 1**).

329 The *priA Met462Arg* allele renders cells equally permissive for phage growth as those  
330 deleted in *ddmABC* and the mutations together do not increase the plating efficiency. Curiously,  
331 PriA has been shown to recognize stalled replication complexes generated when palindromic  
332 sequences interfere with DNA replication processes<sup>48</sup>. PriA is universally conserved in bacteria  
333 and likely works with DdmABC proteins to recognize PriA-DNA complexes that are uniquely  
334 formed by either palindromic sequences or certain types of DNA damage (**Figure 7**). For bacteria  
335 such as *V. cholerae* that encounter phage in many environments and the host, the DdmABC system  
336 may have a profound influence on phage infection as well as the acquisition of at least some  
337 plasmids. A recent finding reveals that some plasmids are not stable in *V. cholerae* and that more  
338 than one abortive system may be restrictive<sup>8,36</sup>. Here we have shown the DdmABC system is also  
339 highly endogenously active against certain phages that are abundant in many environments and  
340 reveal both a *cis*-acting signal and a co-requirement of the host factor PriA as minimal  
341 requirements. Furthermore, because PriA is recruited in key DNA repair and replication processes,  
342 DdmABC proteins may reduce the fitness of bacteria that encounter various stresses that damage  
343 DNA and elicit such responses. We discovered that the DdmABC system increases sensitivity to  
344 both ultraviolet radiation and chemical agents that are previously demonstrated to induce damage  
345 that recruits PriA during DNA repair<sup>66-68</sup>. Thus, this phage resistance mechanism in *V. cholerae*  
346 7<sup>th</sup> pandemic strains may impose a fitness cost for environmental strains of *V. cholerae* (which  
347 typically lack the DdmABC system) if these strains experience strong ambient sunlight and UV  
348 flux or exposure to mutagenic molecules in aquatic habitats or other environments.

349           Recently published mechanistic work on antiphage defense systems continues to reveal  
350 striking similarities between bacteriophage abortive infection mechanisms and eukaryotic innate  
351 immunity processes<sup>2,3,41</sup>. Previous work indicates RAD50-Mre11-Nbs1 DNA damage machinery  
352 components (which are orthologous to DdmA and DdmC) are regulated and disrupted by several  
353 adenovirus-encoded proteins during infection and this is critical for maintaining viral DNA  
354 replication<sup>69,70</sup>. Both Rad50 and Mre11 are implicated in the recognition of cytoplasmic dsDNA  
355 and activation of the innate immune genes including STING and IRF3<sup>71</sup>. Rad50-CARD9 signaling  
356 complexes in dendritic cells have been demonstrated to activate NF- $\kappa$ B and the production of IL-  
357 1 $\beta$  when a dsDNA vector was transfected or when dendritic cells were infected with a DNA virus  
358<sup>72</sup>. Thus, insights gained on the mechanism of phage recognition through the DdmABC/PriA  
359 system may be highly relevant to the innate immune recognition of eukaryotic DNA viruses or the  
360 use of DNA vectors in human gene therapy.

361           Of note, DdmABC also possesses similarities to studied antiphage defense systems  
362 encoded on bacteriophages. The Old (*overcoming lysogenization defect*) protein encoded by  
363 bacteriophage P2 kills *E.coli recB* and *recC* mutants and interferes with phage lambda growth by  
364 killing cells unless the lambda-encoded recombination genes are deleted<sup>73</sup>. The CTD structure of  
365 Old protein also bears resemblance to Rad50 protein but possesses a fused nuclease domain similar  
366 to Mre11 at its N-terminus<sup>74</sup>. Thus, even phages apparently acquired and adapted Rad50/SbcC-  
367 like proteins to sense recombination-based signals and then utilize those signals to degrade the  
368 chromosome of the host bacterium. We propose Rad50 and many other SMC-like proteins, that  
369 were previously classified as first responders for DNA damage recognition and repair, are also  
370 likely to be major sensors of damaged DNA replication processes that represent pathogen-  
371 associated molecular patterns (PAMPs) for the replication of foreign DNA. How this anti-phage  
372 and anti-plasmid system has shaped the evolution of *V. cholerae* is an important consideration in  
373 future studies focused on understanding the emergence of this highly successful pandemic  
374 pathogen. These insights may also be important to recognizing how mammalian cells respond to  
375 DNA viruses or vectors used in therapeutic applications.

## 376 **Funding**

377 This work was supported by NIH/National Institute of Allergy and Infectious Diseases Grant  
378 R01AI018045- JJM.

## 379 **References**

- 380 1. Labrie, S. J., Samson, J. E. & Moineau, S. Bacteriophage resistance mechanisms. *Nature Reviews*  
381 *Microbiology* **8**, 317–327 (2010).
- 382 2. Duncan-Lowey, B. & Kranzusch, P. J. CBASS phage defense and evolution of antiviral nucleotide  
383 signaling. *Current Opinion in Immunology* **74**, 156–163 (2022).
- 384 3. Wein, T. & Sorek, R. Bacterial origins of human cell-autonomous innate immune mechanisms.  
385 *Nature Reviews Immunology* **22**, 629–638 (2022).
- 386 4. Doron, S. *et al.* Systematic discovery of antiphage defense systems in the microbial pangenome.  
387 *Science* **359**, eaar4120 (2018).
- 388 5. Makarova, K. S., Wolf, Y. I. & Koonin, E. V. Comparative genomics of defense systems in archaea  
389 and bacteria. *Nucleic Acids Research* **41**, 4360–4377 (2013).
- 390 6. Whiteley, A. T. *et al.* Bacterial cGAS-like enzymes synthesize diverse nucleotide signals. *Nature*  
391 **567**, 194–199 (2019).
- 392 7. Cohen, D. *et al.* Cyclic GMP–AMP signalling protects bacteria against viral infection. *Nature* **574**,  
393 691–695 (2019).
- 394 8. Jaskólska, M., Adams, D. W. & Blokesch, M. Two defence systems eliminate plasmids from seventh  
395 pandemic *Vibrio cholerae*. *Nature* **604**, 323–329 (2022).
- 396 9. Comeau, A. M. *et al.* Exploring the prokaryotic virosphere. *Research in Microbiology* **159**, 306–313  
397 (2008).
- 398 10. Clokie, M. R. J., Millard, A. D., Letarov, A. V. & Heaphy, S. Phages in nature. *Bacteriophage* **1**, 31–  
399 45 (2011).
- 400 11. Stern, A. & Sorek, R. The phage-host arms race: Shaping the evolution of microbes. *BioEssays* **33**,  
401 43–51 (2011).
- 402 12. Hampton, H. G., Watson, B. N. J. & Fineran, P. C. The arms race between bacteria and their phage  
403 foes. *Nature* **577**, 327–336 (2020).

- 404 13. Lander, E. S. The Heroes of CRISPR. *Cell* **164**, 18–28 (2016).
- 405 14. Salmond, G. P. C. & Fineran, P. C. A century of the phage: past, present and future. *Nature Reviews*  
406 *Microbiology* **13**, 777–786 (2015).
- 407 15. Kaper, J. B., Morris, J. G. & Levine, M. M. Cholera. *Clin. Microbiol. Rev.* **8**, 48 (1995).
- 408 16. Faruque, S. M. & Mekalanos, J. J. Pathogenicity islands and phages in *Vibrio cholerae* evolution.  
409 *Trends in Microbiology* **11**, 505–510 (2003).
- 410 17. Waldor, M. K. & Mekalanos, J. J. Lysogenic Conversion by a Filamentous Phage Encoding Cholera  
411 Toxin. *Science* **272**, 1910 (1996).
- 412 18. Taylor, R. K., Miller, V. L., Furlong, D. B. & Mekalanos, J. J. Use of *phoA* gene fusions to identify a  
413 pilus colonization factor coordinately regulated with cholera toxin. *Proc Natl Acad Sci USA* **84**, 2833  
414 (1987).
- 415 19. Herrington, D. A. *et al.* Toxin, toxin-coregulated pili, and the *toxR* regulon are essential for *Vibrio*  
416 *cholerae* pathogenesis in humans. *Journal of Experimental Medicine* **168**, 1487–1492 (1988).
- 417 20. Hassan, F., Kamruzzaman, M., Mekalanos, J. J. & Faruque, S. M. Satellite phage TLC $\phi$  enables  
418 toxigenic conversion by CTX phage through *dif* site alteration. *Nature* **467**, 982–985 (2010).
- 419 21. Faruque, S. M., Albert, M. J. & Mekalanos, J. J. Epidemiology, Genetics, and Ecology of Toxigenic  
420 *Vibrio cholerae*. *Microbiol. Mol. Biol. Rev.* **62**, 1301 (1998).
- 421 22. Mutreja, A. *et al.* Evidence for several waves of global transmission in the seventh cholera pandemic.  
422 *Nature* **477**, 462–465 (2011).
- 423 23. Domman, D. *et al.* Integrated view of *Vibrio cholerae* in the Americas. *Science* **358**, 789 (2017).
- 424 24. Weill, F.-X. *et al.* Genomic history of the seventh pandemic of cholera in Africa. *Science* **358**, 785  
425 (2017).
- 426 25. Ramamurthy, T. *et al.* Virulence patterns of *Vibrio cholerae* non-01 strains isolated from hospitalised  
427 patients with acute diarrhoea in Calcutta, India. *Journal of Medical Microbiology* vol. 39 310–317  
428 (1993).

- 429 26. Sharma Charu *et al.* Molecular Analysis of Non-O1, Non-O139 *Vibrio cholerae* Associated with an  
430 Unusual Upsurge in the Incidence of Cholera-Like Disease in Calcutta, India. *Journal of Clinical*  
431 *Microbiology* **36**, 756–763 (1998).
- 432 27. Chakraborty Soumen *et al.* Virulence Genes in Environmental Strains of *Vibrio cholerae*. *Applied*  
433 *and Environmental Microbiology* **66**, 4022–4028 (2000).
- 434 28. Dziejman, M. *et al.* Comparative genomic analysis of *Vibrio cholerae*: Genes that correlate with  
435 cholera endemic and pandemic disease. *Proc Natl Acad Sci USA* **99**, 1556 (2002).
- 436 29. Faruque, S. M. *et al.* Seasonal epidemics of cholera inversely correlate with the prevalence of  
437 environmental cholera phages. *Proceedings of the National Academy of Sciences* **102**, 1702–1707  
438 (2005).
- 439 30. Faruque, S. M. *et al.* Self-limiting nature of seasonal cholera epidemics: Role of host-mediated  
440 amplification of phage. *Proceedings of the National Academy of Sciences* **102**, 6119–6124 (2005).
- 441 31. Nelson, E. J., Harris, J. B., Glenn Morris, J., Calderwood, S. B. & Camilli, A. Cholera transmission:  
442 the host, pathogen, and bacteriophage dynamic. *Nature Reviews Microbiology* **7**, 693–702 (2009).
- 443 32. Seed, K. D. *et al.* Evidence of a Dominant Lineage *Vibrio cholerae*-Specific Lytic Bacteriophages  
444 Shed by Cholera Patients over a 10-Year Period in Dhaka, Bangladesh. *mBio* **2**, e00334-10 (2011).
- 445 33. Faruque, S. M. & Mekalanos, J. J. Phage-bacterial interactions in the evolution of toxigenic *Vibrio*  
446 *cholerae*. *Virulence* **3**, 556–565 (2012).
- 447 34. Yen, M. & Camilli, A. Mechanisms of the evolutionary arms race between *Vibrio cholerae* and  
448 *Vibriophage* clinical isolates. *Int Microbiol* **20**, 116–120 (2017).
- 449 35. Hoque M.M., Naser I.B., Bari S.M., Zhu J., Mekalanos J.J. & Faruque S.M. Quorum Regulated  
450 Resistance of *Vibrio cholerae* against Environmental Bacteriophages. *Sci Rep* **6**, 37956–37956  
451 (2016).
- 452 36. O’Hara, B. J., Alam, M. & Ng, W.-L. The *Vibrio cholerae* Seventh Pandemic Islands act in tandem to  
453 defend against a circulating phage. *PLOS Genetics* **18**, e1010250 (2022).



- 454 37. Brown, S., Brickman, E. R. & Beckwith, J. Blue ghosts: a new method for isolating amber mutants  
455 defective in essential genes of Escherichia coli. *J. Bacteriol.* **146**, 422 (1981).
- 456 38. Albertini, A. M., Hofer, M., Calos, M. P. & Miller, J. H. On the formation of spontaneous deletions:  
457 The importance of short sequence homologies in the generation of large deletions. *Cell* **29**, 319–328  
458 (1982).
- 459 39. Court D.L., Gan J., Liang Y.H., Shaw G.X., Tropea J.E., Costantino N., Waugh D.S. & Ji X. RNase  
460 III: Genetics and function; structure and mechanism. *Annu Rev Genet* **47**, 405–431 (2013).
- 461 40. Lee, E. H. & Kornberg, A. Replication deficiencies in priA mutants of Escherichia coli lacking the  
462 primosomal replication n' protein. *Proceedings of the National Academy of Sciences* **88**, 3029–3032  
463 (1991).
- 464 41. Lowey, B. *et al.* CBASS Immunity Uses CARF-Related Effectors to Sense 3'–5'- and 2'–5'-Linked  
465 Cyclic Oligonucleotide Signals and Protect Bacteria from Phage Infection. *Cell* **182**, 38-49.e17  
466 (2020).
- 467 42. Krishnan, A., Burroughs, A. M., Iyer, L. M. & Aravind, L. Comprehensive classification of ABC  
468 ATPases and their functional radiation in nucleoprotein dynamics and biological conflict systems.  
469 *Nucleic Acids Research* **48**, 10045–10075 (2020).
- 470 43. Mirdita M., Schütze K., Moriwaki Y., Heo L., Ovchinnikov S. & Steinegger M. ColabFold: making  
471 protein folding accessible to all. *Nature Methods* **19**, 679–682 (2022).
- 472 44. Walker, P. J. *et al.* Changes to virus taxonomy and to the International Code of Virus Classification  
473 and Nomenclature ratified by the International Committee on Taxonomy of Viruses (2021). *Archives*  
474 *of Virology* **166**, 2633–2648 (2021).
- 475 45. Sandler Steven J. & Marians Kenneth J. Role of PriA in Replication Fork Reactivation in Escherichia  
476 coli. *Journal of Bacteriology* **182**, 9–13 (2000).
- 477 46. Tanaka, T., Taniyama, C., Arai, K.-I. & Masai, H. ATPase/helicase motif mutants of Escherichia coli  
478 PriA protein essential for recombination-dependent DNA replication. *Genes to Cells* **8**, 251–261  
479 (2003).

- 480 47. Tanaka, T., Mizukoshi, T., Sasaki, K., Kohda, D. & Masai, H. Escherichia coli PriA Protein, Two  
481 Modes of DNA Binding and Activation of ATP Hydrolysis. *Journal of Biological Chemistry* **282**,  
482 19917–19927 (2007).
- 483 48. Windgassen, T. A., Leroux, M., Sandler, S. J. & Keck, J. L. Function of a strand-separation pin  
484 element in the PriA DNA replication restart helicase. *Journal of Biological Chemistry* **294**, 2801–  
485 5614 (2019).
- 486 49. Nurse, P., Zavitz, K. & Marians, K. Inactivation of the Escherichia coli priA DNA replication protein  
487 induces the SOS response. *J Bacteriol* **173**, 6686–6693 (1991).
- 488 50. Sandler, S. J., Samra, H. S. & Clark, A. J. Differential Suppression of priA2::kan Phenotypes in  
489 Escherichia coli K-12 by Mutations in priA, lexA, and dnaC. *Genetics* **143**, 5–13 (1996).
- 490 51. McCool, J. D. & Sandler, S. J. Effects of mutations involving cell division, recombination, and  
491 chromosome dimer resolution on a priA2::kan mutant. *Proceedings of the National Academy of*  
492 *Sciences* **98**, 8203–8210 (2001).
- 493 52. Voineagu, I., Narayanan, V., Lobachev, K. S. & Mirkin, S. M. Replication stalling at unstable  
494 inverted repeats: Interplay between DNA hairpins and fork stabilizing proteins. *Proceedings of the*  
495 *National Academy of Sciences* **105**, 9936–9941 (2008).
- 496 53. Drlica, K. *et al.* Quinolones: Action and Resistance Updated. *Current Topics in Medicinal Chemistry*  
497 **9**, 981–998 (2009).
- 498 54. Lundin, C. *et al.* Methyl methanesulfonate (MMS) produces heat-labile DNA damage but no  
499 detectable in vivo DNA double-strand breaks. *Nucleic Acids Research* **40**, 5794–5794 (2012).
- 500 55. Tomasz, M. Mitomycin C: small, fast and deadly (but very selective). *Chemistry & Biology* **2**, 575–  
501 579 (1995).
- 502 56. Kogoma T., Cadwell G.W., Barnard K.G., & Asai T. The DNA replication priming protein, PriA, is  
503 required for homologous recombination and double-strand break repair. *Journal of Bacteriology* **178**,  
504 1258–1264 (1996).

- 505 57. Graumann, P. L. & Knust, T. Dynamics of the bacterial SMC complex and SMC-like proteins  
506 involved in DNA repair. *Chromosome Research* **17**, 265–275 (2009).
- 507 58. Uhlmann, F. SMC complexes: from DNA to chromosomes. *Nature Reviews Molecular Cell Biology*  
508 **17**, 399–412 (2016).
- 509 59. Hirano, T. The ABCs of SMC proteins: two-armed ATPases for chromosome condensation,  
510 cohesion, and repair. *Genes & Development* **16**, 399–414 (2002).
- 511 60. Pellegrino S., Radzimanowski J., de Sanctis D., Boeri Erba E., McSweeney S. & Timmins J.  
512 Structural and Functional Characterization of an SMC-like Protein RecN: New Insights into Double-  
513 Strand Break Repair. *Structure* **20**, 2076–2089 (2012).
- 514 61. Schiller, C. B., Seifert, F. U., Linke-Winnebeck, C. & Hopfner, K.-P. *Cold Spring Harbor*  
515 *Perspectives in Biology* **6**, (2014).
- 516 62. Syed, A. & Tainer, J. A. The MRE11–RAD50–NBS1 Complex Conducts the Orchestration of  
517 Damage Signaling and Outcomes to Stress in DNA Replication and Repair. *Annu. Rev. Biochem.* **87**,  
518 263–294 (2018).
- 519 63. Connelly, J. C., de Leau, E. S. & Leach, D. R. DNA cleavage and degradation by the SbcCD protein  
520 complex from *Escherichia coli*. *Nucleic Acids Res* **27**, 1039–1046 (1999).
- 521 64. Connelly, J. C., de Leau, E. S. & Leach, D. R. F. Nucleolytic processing of a protein-bound DNA end  
522 by the *E. coli* SbcCD (MR) complex. *DNA Repair* **2**, 795–807 (2003).
- 523 65. Eykelenboom, J. K., Blackwood, J. K., Okely, E. & Leach, D. R. F. SbcCD Causes a Double-Strand  
524 Break at a DNA Palindrome in the *Escherichia coli* Chromosome. *Molecular Cell* **29**, 644–651  
525 (2008).
- 526 66. Ivancić-Bacće, I., Vlasić, I., Cogelja-Cajo, G., Brcić-Kostić, K. & Salaj-Smic, E. Roles of PriA  
527 protein and double-strand DNA break repair functions in UV-induced restriction alleviation in  
528 *Escherichia coli*. *Genetics* **174**, 2137–2149 (2006).
- 529 67. Kline, K. A. & Seifert, H. S. Mutation of the *priA* gene of *Neisseria gonorrhoeae* affects DNA  
530 transformation and DNA repair. *J Bacteriol* **187**, 5347–5355 (2005).

- 531 68. Madison, K. E., Abdelmeguid, M. R., Jones-Foster, E. N. & Nakai, H. A New Role for Translation  
532 Initiation Factor 2 in Maintaining Genome Integrity. *PLoS Genetics* **8**, e1002648 (2012).
- 533 69. Evans Jared D. & Hearing Patrick. Relocalization of the Mre11-Rad50-Nbs1 Complex by the  
534 Adenovirus E4 ORF3 Protein Is Required for Viral Replication. *Journal of Virology* **79**, 6207–6215  
535 (2005).
- 536 70. Karen Kasey A., Hoey Peter J., Young C. S. H., & Hearing Patrick. Temporal Regulation of the  
537 Mre11-Rad50-Nbs1 Complex during Adenovirus Infection. *Journal of Virology* **83**, 4565–4573  
538 (2009).
- 539 71. Kondo T., Kobayashi J., Saitoh T., Maruyama K., Ishii K.J., Barber G.N., Komatsu K., Akira S.  
540 & Kawai T. DNA damage sensor MRE11 recognizes cytosolic double-stranded DNA and induces  
541 type I interferon by regulating STING trafficking. *Proceedings of the National Academy of Sciences*  
542 **110**, 2969–2974 (2013).
- 543 72. Roth S., Rottach A., Lotz-Havla A.S., Laux V., Muschwackh A., Gersting S.W., Muntau A.C.,  
544 Hopfner K.P., Jin L., Vanness K., Petrini J.H., Drexler I., Leonhardt H. & Ruland J. Rad50-CARD9  
545 interactions link cytosolic DNA sensing to IL-1 $\beta$  production. *Nature Immunology* **15**, 538–545  
546 (2014).
- 547 73. Finkel, S., Hailing, C. & Calendar, R. Selection of lambda Spi<sup>-</sup> transducing phages using the P2 old  
548 gene cloned onto a plasmid. *Gene* **46**, 65–69 (1986).
- 549 74. Schiltz, C. J., Lee, A., Partlow, E. A., Hosford, C. J. & Chappie, J. S. Structural characterization of  
550 Class 2 OLD family nucleases supports a two-metal catalysis mechanism for cleavage. *Nucleic Acids*  
551 *Research* **47**, 9448–9463 (2019).
- 552 75. Dalia, T. N., Chlebek, J. L. & Dalia, A. B. A modular chromosomally integrated toolkit for ectopic  
553 gene expression in *Vibrio cholerae*. *Scientific Reports* **10**, 15398 (2020).
- 554 76. Edwards, R. A., Keller, L. H. & Schifferli, D. M. Improved allelic exchange vectors and their use to  
555 analyze 987P fimbria gene expression. *Gene* **207**, 149–157 (1998).

- 556 77. Choi K.H., Gaynor J.B., White K.G., Lopez C., Bosio C.M., Karkhoff-Schweizer R.R. & Schweizer  
557 H.P. A Tn7-based broad-range bacterial cloning and expression system. *Nature Methods* **2**, 443–448  
558 (2005).
- 559 78. CLC Genomics Workbench.
- 560 79. Lorenz R., Bernhart S.H., Höner Zu Siederdisen C., Tafer H., Flamm C., Stadler P.F. & Hofacker  
561 I.L. ViennaRNA Package 2.0. *Algorithms for Molecular Biology* **6**, 26 (2011).
- 562 80. The PyMOL Molecular Graphics System.
- 563 81. Gabler F., Nam S.Z., Till S., Mirdita M., Steinegger M., Söding J., Lupas A.N. & Alva V. Protein  
564 Sequence Analysis Using the MPI Bioinformatics Toolkit. *Current Protocols in Bioinformatics* **72**,  
565 e108 (2020).

566

567

568

569

570

571

572

573

574

575

576

## 577 **Figures**

### 578 **Figure 1. CCD phenotype and selection for suppressors reveal a *cis*-acting sequence in a** 579 **plasmid**

580 a| Blue ghost phenotype when transformed cells grow as colonizes and release b-galactosidase. b|  
581 A cell-dependent death (CDD) phenotype is observed when a LacZ-containing plasmid is  
582 transformed into *V.cholerae* and the transformants are plated at high density under plasmid-  
583 selecting conditions. c| Map of the plasmid showing deletions (in pink) identified in recovered  
584 plasmid mutants that enable survival. d| Sequence of T7 RNase-III site common within all  
585 deletions and predicted secondary structure. A colorimetric confidence scale for base pairing  
586 prediction is shown.

### 587 **Figure 2. Colabfold predictions of *V.cholerae* PriA and the three proteins encoded in the** 588 **DdmABC operon.**

589 a| Predicted structure of *V.cholerae* PriA and the represented domains conserved in other bacterial  
590 PriA proteins. The CRR domain possesses the M462R mutation identified in this work. The  
591 CRR/b-hairpin domain is circled. b| Alignment of *V.cholerae* and *E.coli* b-hairpin domain residues.  
592 The CRR domain is boxed and the position of the M462R is indicated. Nucleotides known to  
593 interact with the *E.coli* PriA  $\beta$ -hairpin in a stalled replication fork are shown. c| Predicted PDB  
594 structures of DdmA, DdmB, and DdmC and predicted domains and motifs. Mutations identified  
595 in this work are indicated. d| Cartoon model showing a general DdmABC complex and what this  
596 may identify during restriction of phage or plasmids. e| Homology between DdmABC and 3C-ABC  
597 complexes based on conserved domains present in proteins.

### 598 **Figure 3. Sequences from restricted phages cloned in place of the T7 Rnase III sequence** 599 **cause CDD.**

600 a | Diagram showing the cloning of random phage DNA fragments into a plasmid and screening  
601 for CDD. b-d | Sequences identified in phage VIBO4 by position and predicted secondary  
602 structure. A colorimetric confidence scale for base pairing prediction is shown. e | One VIB04  
603 sequence is homologous to the RNaseIII sites in related bacteriophage T7.

604 **Figure 4. Mutations that disrupt the hairpin sequence eliminate cell-dependent death.**

605 a|A Schematic showing the position of the original sequence and its replacement by a synthetically  
606 designed sequence seq 2. The hairpin-forming nucleotides in both the original and seq2 are boxed  
607 in green and purple. b|The predicted hairpin of the original and seq2 sequences and its derivatives  
608 are shown. Mutations are boxed to indicate potential disruptions to hairpin formation. c| Screening  
609 assay showing the presence or absence of CDD after 12 hours. d| Cells recovered after 12 hours  
610 for each plasmid in both WT and  $\Delta VSP-2$  mutants. The colony morphology of plated transformed  
611 cells is scored for each. The “blue ghost” phenotype is indicated by “A”. Normal blue colonies are  
612 indicated by “B”. Significance is indicated (\* < 0.05 and \*\*\*\* < 0.0001) .

613 **Figure 5. Phage production and cell viability during phage infection are impacted by VSP-**  
614 **II**

615 a |Plaque forming units (PFU) representing the production of infectious phage in both WT and  
616 DVSP-II mutant strains in liquid culture for 150 minutes. b and c| Cells were infected with VIB04  
617 phage and spotted at high density on agar to mimic CCD conditions. Both phage (PFU) and viable  
618 bacterial (CFU) were enumerated for six hours post-infection.

619 **Figure 6. Sensitivity to UV and DNA-damaging chemicals is enhanced by VSP-II**

620 a |Measured doses of UV exposure between 0 and 64 Joules/cm<sup>2</sup> to spotted cells on agar reveal the  
621 sensitivity based on recovered CFU. b-d |Comparison of subinhibitory concentrations of Methyl  
622 methane sulfonate (MMS) 30ug/ml, Nalidixic acid (Nal) 50ng/ml, and Mitomycin C 5ng/ml (MC)  
623 to the growth of WT and both *Dvsp-II* and *priA* mutants in liquid culture.

624 **Figure 7. A general model of signal recognition by plasmids, phages, and DNA damage**

625 **Table 1. Identified genomic suppressors and their effects on plasmid copy number and**  
626 **VIB04 phage titers.** In addition to VSP-2 and non-VSP-2 mutants, WR2700 and WR2700  $\Delta VSP-$   
627 **2** are included as controls permissive and restrictive for phage growth.

628

629

## 630 **Methods**

### 631 **Bacterial strains and plasmids**

632 Strains and plasmids are listed in **Supplemental Table S1**. Strain TND0652 was a  
633 generous gift from Ankur Dalia and published elsewhere<sup>75</sup>. WPR2700 was first constructed to test  
634 the functionality of the *V.cholerae* O395 CRISPR-CasI-E system in a derivative of the El Tor  
635 strain E7946. To construct WPR2700, we first inserted a 1.4kb DNA fragment containing the *LacI*  
636 gene and an inducible tac promoter in front of the CRISPR-Cas complex in O395 at nt position  
637 2827729 using suicide vector pRE107<sup>76</sup> and 500 nts of flanking sequence. The DNA from O395  
638 was prepared and transformed and integrated into TND0625 and we selected for uptake using  
639 ampicillin (100ug/ml). In this strain, the CRISPR-CAS-I-E merodiploid sequence was crossed out  
640 using sucrose counter-selection as previously described<sup>76</sup>. Insertion of LacIq-ptac-CRISPR/Cas-  
641 IE was confirmed by PCR and sequencing. A 37,850 nucleotide region from O395 from *PurD*  
642 (Chromosome I position 311908) through *Fis* genes (Chromosome I position 349559) replaced the  
643 20,417 nucleotide region E7946 derivative this introducing the entire CRISPR-CAS-I-E operon  
644 and several adjacent genes both up and downstream from O395.

645 pWR1566 is derived from pUC18-miniTn7-LacZ and has a deletion of the Gentamycin  
646 resistance gene between flanking FRT sites generated by co-transformation with the pFRT2 vector  
647 expressing flip recombinase<sup>77</sup>.

### 648 **CCD assay and selection and sequencing of suppressors**

649 pWR1566 was purified from laboratory *E.coli* strain NEB 10-beta (New England Biolabs)  
650 and used to transform *V.cholerae* strain WR2700 using electroporation. Transformants were  
651 selected on LB agar supplemented with Carbenicillin (100µg/ml) and XGAL (150µg/ml).  
652 Colonies were resuspended in liquid no more than 12 hours after plating and grown in LB media  
653 supplemented with Carbenicillin (100ug/ml) at 37°C.

654 For screening of CCD and selection of survival mutants, transformed strains were grown  
655 to high OD600 (> 1.5) in shaking tubes or flasks at 37°C (RPM=300). 1.0ml of the culture was  
656 centrifuged at 3000 RFC for 4 minutes in a microcentrifuge. The supernatant was decanted and  
657 cells were resuspended in 100ul LB. This was serially diluted 4-fold 12 times in a 96-well plate



658 row. 3ul of each dilution was spotted on LB agar (Carb 100ul/ml +XGal150ug/ml) and allowed to  
659 dry for 10 minutes before growth at 30°C. Growth on plates was observed 16-20 hours post-  
660 plating.

661 For the selection of survivors from CDD, we plugged spotted agar areas where cell growth  
662 was apparently absent. These plugs were resuspended in 1.0 ml LB, vortexed, and plated on LB  
663 agar (Carb 100ul/ml +XGal150ug/ml). Colonies that grew were scored for blue/white and purified  
664 on LB (Carb 100ul/ml +XGal150ug/ml). Plasmid and chromosomal DNA were prepared using the  
665 Zymo Genomic DNA Isolation kit (Zymo). Mutants were sequenced using Illumina Miseq and  
666 libraries were prepared using the DNA Ultra II library preparation kit (New England Biolabs).  
667 Mutations and depth were mapped using CLC-Bio Workbench v8 <sup>78</sup>.

### 668 **Phage DNA shotgun cloning**

669 Viral DNA from VIB04 was isolated from CsCl-purified particles dialyzed into 10mM  
670 Tris-Cl pH8.0 1mM EDTA and adjusted to 500ul using 10mM Tris-Cl pH8.0 1mM EDTA using  
671 one phenol extracted (200ul, equilibrated with 50mM Tris-Cl pH8.0). This was briefly mixed using  
672 a vortex and the top layer was carefully removed and kept after separation in a 55°C heat block  
673 for 20-30 minutes. Three successive Phenol:Chloroform: Isoamyl (20% volume, 25:24:1, phenol  
674 equilibrated with 50mM Tris-Cl pH8.0) extractions were performed as above. DNA was  
675 precipitated using three volumes of 100% ethanol and the pellet was washed twice with 80%  
676 ethanol and dried. DNA was dissolved in water, and sheared to ~500nt using a (QSONICA  
677 Q800R3) for five minutes (30 seconds cycled ON/OFF at 20%). DNA was end-repaired using  
678 DNA Repair Mix (NEB E6050L) and shotgun cloned into pWR2700 that had been cut with SmaI  
679 (NEB R0141L) and AvrII (NEB R0174L), blunted using DNA Repair Mix, and dephosphorylated  
680 using Antarctic Phosphatase (NEB M0289L) using T4 Blunt T/A DNA ligase (NEB M0367L).  
681 Transformants were cultured and screened for CDD as described in this work.

### 682 **Cloning of artificial hairpin sequences**

683 Complementary oligonucleotides that form seq2 and seq2\_mutated were ordered. Cloned  
684 hairpin sequences are flanked by PmlI and SmaI restriction sites (**Supplemental Table S1**).  
685 Oligonucleotides were mixed in 100ul at a concentration of 5uM and heated to 95°C and slowly

686 cooled until 50°C to anneal. DNA was digested with PmlI and SmaI (New England Biolabs),  
687 ligated into pWR2700 that had been cut with SmaI (NEB R0141L) and AvrII (NEB R0174L),  
688 blunted using DNA Repair Mix, and dephosphorylated using Antarctic Phosphatase (NEB  
689 M0289L) using T4 Blunt T/A DNA ligase (NEB M0367L). Transformants were cultured and  
690 screened for CDD as described in this work.

### 691 **Phage screening, preparation, and infection assays**

692 A panel of *V.cholerae* phage lysates was prepared on *V.cholerae* strain MAK757 and plated  
693 on both WR2700 and WR2700  $\Delta VSP$ -2. Two candidate phages were identified as VSP-2 restricted.  
694 Both phages were sequenced and one was previously identified as Figure *V.cholerae* phage N4.  
695 To avoid confusion, we renamed the N4 phage “VIB04” in this work because another unrelated  
696 phage also called N4 has been studied previously in the field. The second phage (VIB05) was  
697 isolated from lysate samples kindly provided by Dr. Shah Farque who was previously a member  
698 of the International Centre for Diarrhoeal Disease Research, Dhaka, Bangladesh.

699 Phages were propagated on WR2700  $\Delta VSP$ -2. In brief, sufficient phages were co-plated in  
700 8ml soft top agar (0.3%) with bacteria ( $9 \times 10^7$  CFU from liquid mid-log culture) over 1.5% LB  
701 agar and incubated overnight at 30°C to produce a confluent lysed lawn of *V.cholerae* cells. This  
702 was done in triplicate using 150mm x15mm plates to increase yields. 30ml LB was poured onto  
703 each soft agar overlay and then both soft top agar and LB were mixed using a sterile plate spreader  
704 and the slurry was poured into a centrifuge bottle. This mixture was centrifuged at 15,000 RFC for  
705 20 minutes to remove solids. The supernatant was adjusted to 1.0M NaCl and polyethylene glycol  
706 (PEG) (MW 8000). was added to 0.8% w/v. This solution was incubated on ice for between 4 to 8  
707 hours and then centrifuged at 8,000RFC for 30 minutes (4°C). The supernatant was poured off and  
708 the pellet was gently resuspended in 50mM Tris-Cl pH8.0 and 10mM MgCl<sub>2</sub> and incubated on ice  
709 for 1-2 hours to suspend phage virions. This suspension was centrifuged at 5,000 RFC for 10  
710 minutes (4°C) to remove large insoluble material and the supernatant was collected. The  
711 supernatant was overlayed onto a CsCl step gradient ( $\rho = 1.62, 1.53, \text{ and } 1.62$ ) and spun at 40,000  
712 RPM for 90 minutes using an SW55.1 rotor on a Beckman Ultracentrifuge. The phage band was  
713 collected between  $\rho = 1.53$  and  $\rho = 1.62$  steps and dialyzed into T7 Buffer (100mM Tris-Cl pH7.5,  
714 1.0M NaCl, 1mM EDTA).

715 Phages were titered on WPR2700  $\Delta$ VSP-2 to measure the concentration of infectious  
716 particles. For phage lysis and infected cell survival assays, phage was infected at selected MOI in  
717 liquid culture and for agar assays, infected cells were pelleted at 4,000 RFC and spot plated on 1.5  
718 LB agar. Bacteria were resuspended in 1.0ml at selected time points and the supernatant was both  
719 titered on WPR2700 $\Delta$ VSP-2 and plated on LB agar to determine phage and bacterial  
720 concentrations.

### 721 **Cell viability and growth after UV and mutagenic exposure**

722 To measure survival after UV exposure,  $10^8$  bacterial cells from a growing late log culture  
723 (OD 1.4) were spotted on LB agar and exposed to a range of UV doses determined by time  
724 exposure settings on a UV Stratalinker. Agar with spotted cells was removed as a plug and cells  
725 were resuspended in 1.0ml LB, serially diluted, and plated on LB agar to measure CFU.

726 To measure the effects of mutagenic compounds on bacterial growth, strains were grown  
727 shaking rigorously in 200ul LB in a 96-well plate using a Biotek Synergy MX at 30°C. Initial  
728 screening for inhibitory concentrations of each was first determined using a range of serial  
729 dilutions. A concentration that was minimally inhibitory for WPR2700 was chosen and used for  
730 the entire panel of strains. When growth curves are compared, bacterial cultures were grown to  
731 mid-log (OD 1.0), diluted 10X, and added to wells supplemented with various concentrations of  
732 Nalidixic acid, Methyl Methanosulfate, or Mitomycin C. Optical density at 600nm was measured  
733 during cell growth at 30°C for 6 hours.

### 734 **DNA folding prediction**

735 Predictive folding of ssDNA was completed using ViennaRNA v2.5.18<sup>79</sup>. Fold algorithm  
736 options included minimum free energy and partition function to calculate the base pairing matrix  
737 in addition to the structure. Energy parameters were set for DNA with dangling energies on both  
738 sides of a helix in any case.

### 739 **Protein structure prediction**

740 Protein structures for DdmABC and PriA were predicted using ColabFold run locally on  
741 the Orchestra cluster at Harvard Medical School<sup>43</sup>. Structures were visualized using Pymol

742 (v2.3.4)<sup>80</sup> and colored to specific confidence. Proteins identified as similar to DdmC were  
743 identified using HHPRED in the MPI toolkit <sup>81</sup>.

#### 744 **Statistics**

745           In CCD assays that measured the toxicity of cloned hairpin sequences and were performed  
746 in triplicate, we applied an ordinary one-way in PRISM (v9.4.1) for Windows.

Figure 1

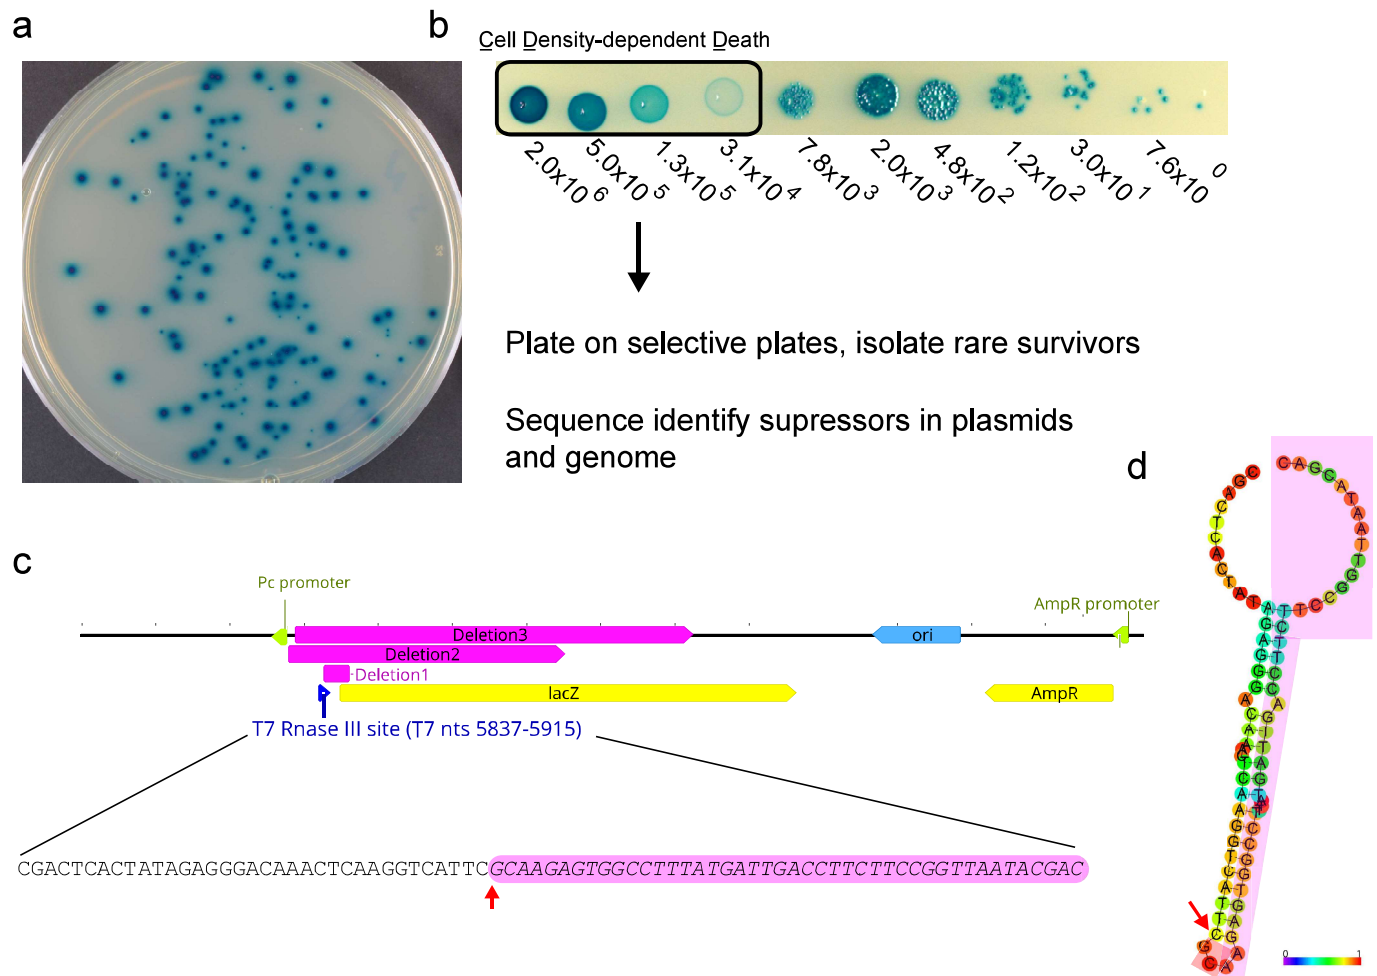

Figure 2

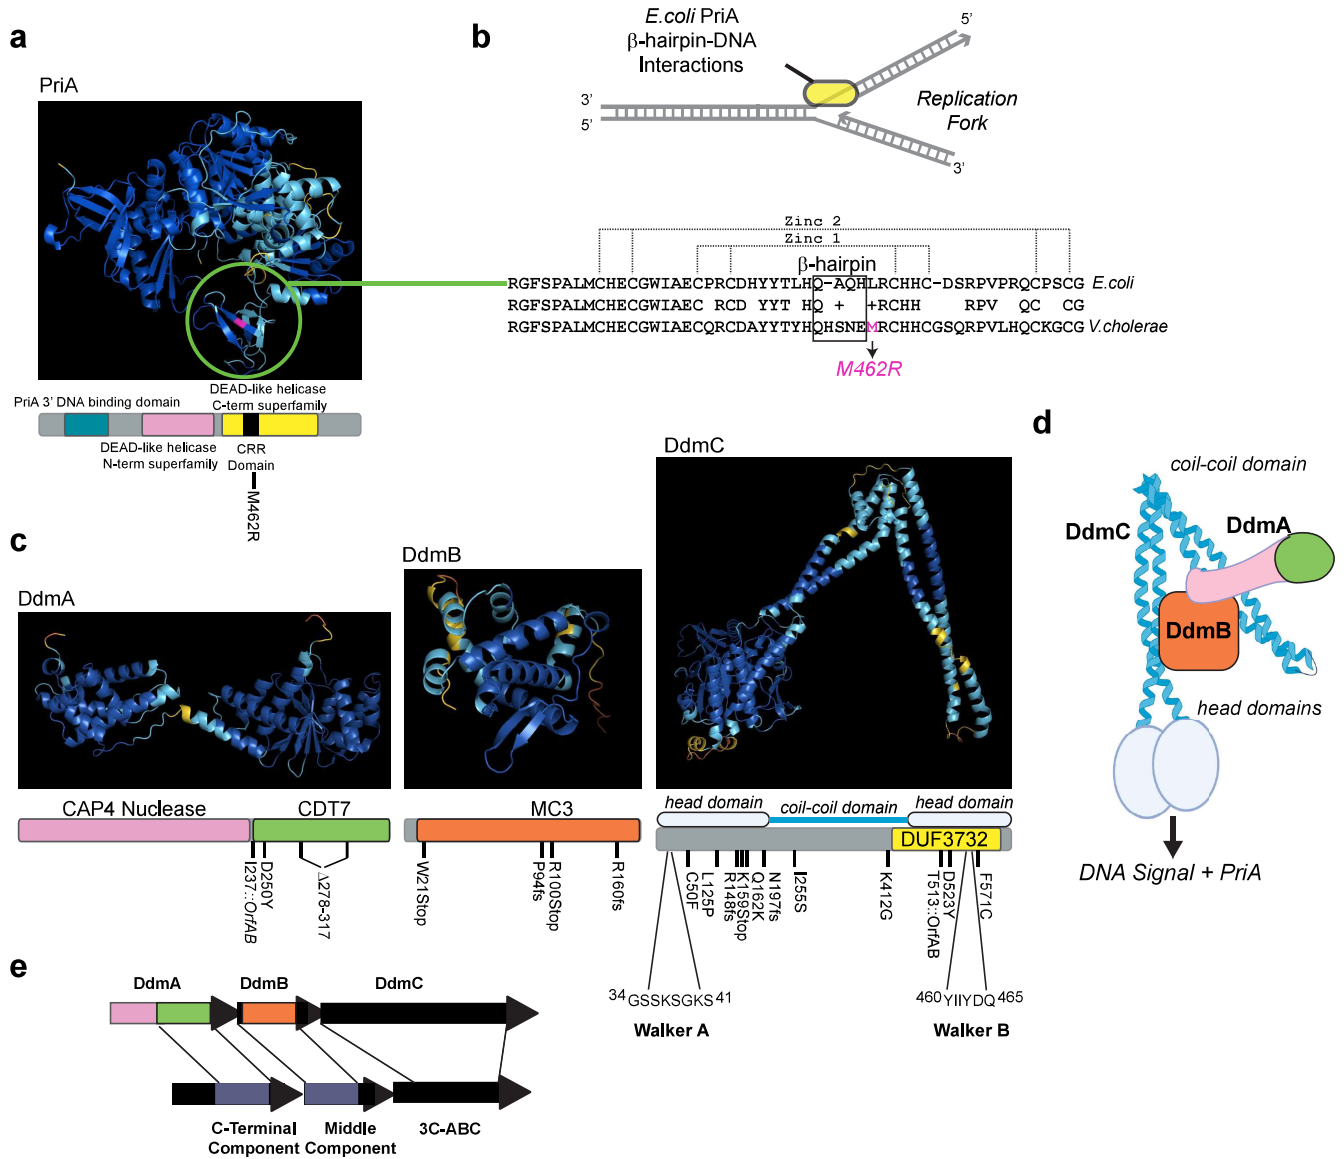

Figure 3

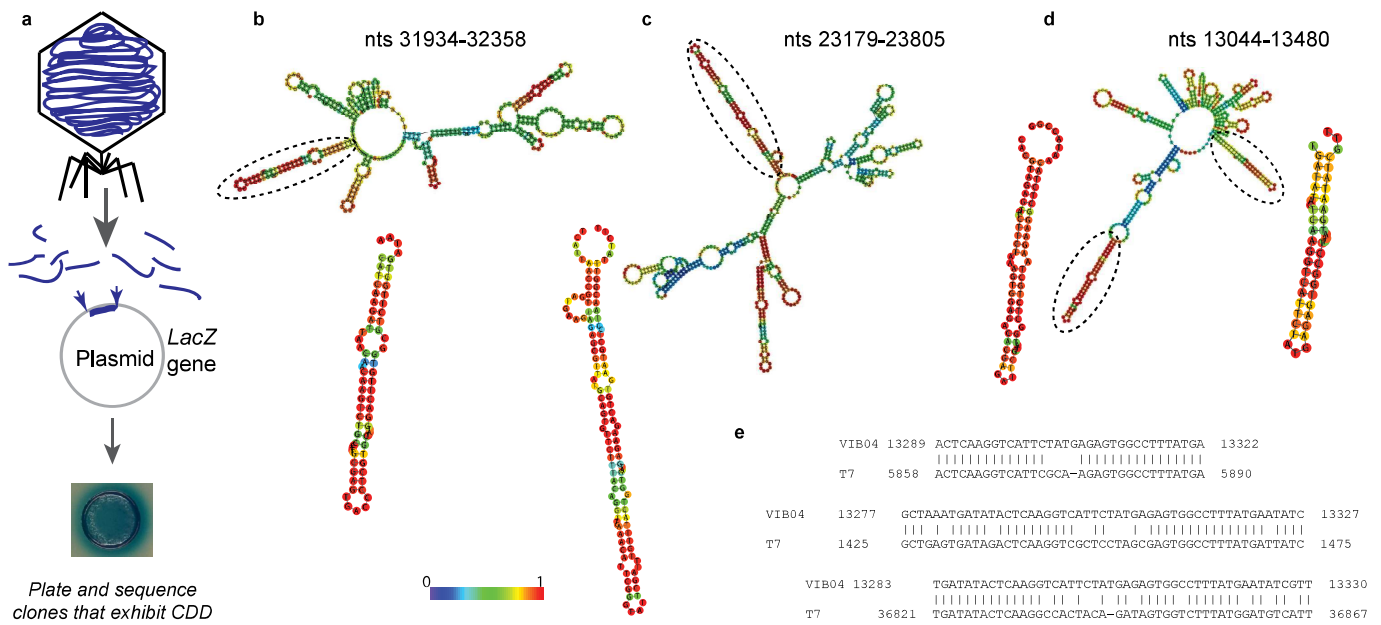

## Figure 4

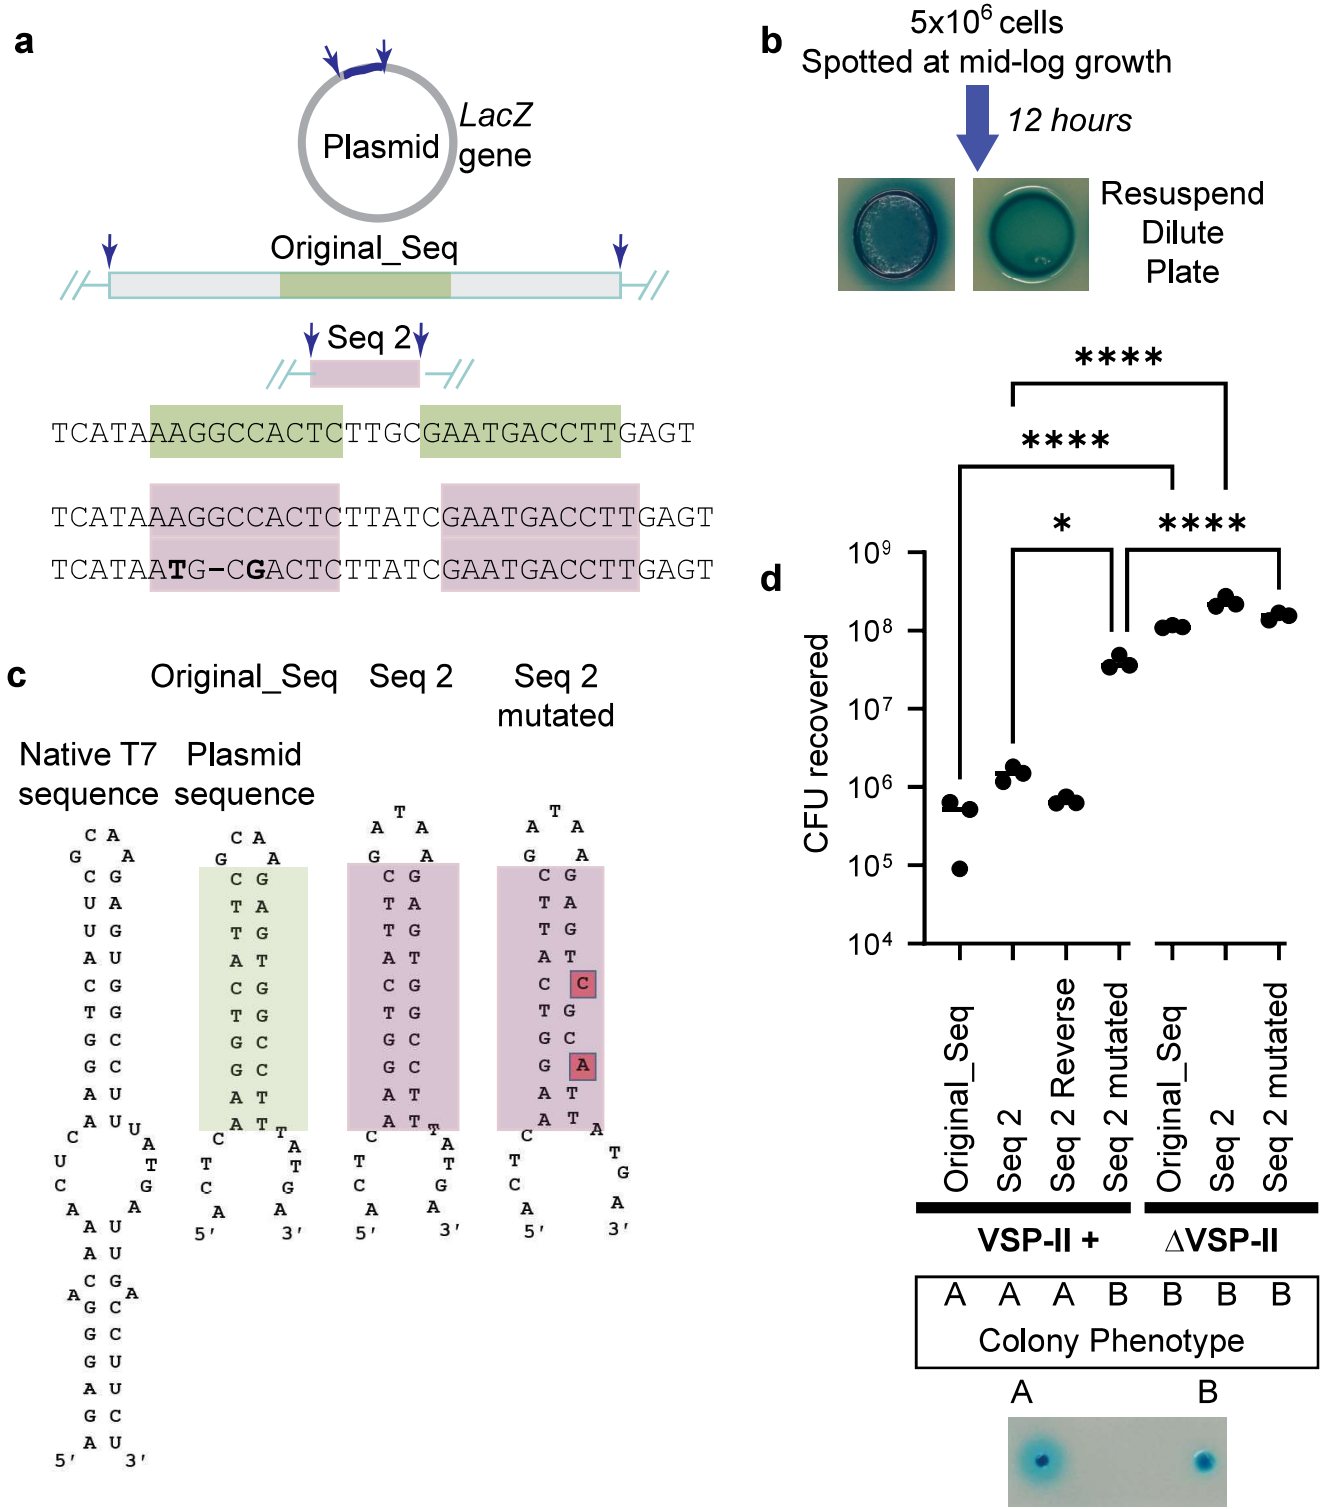



Figure 5

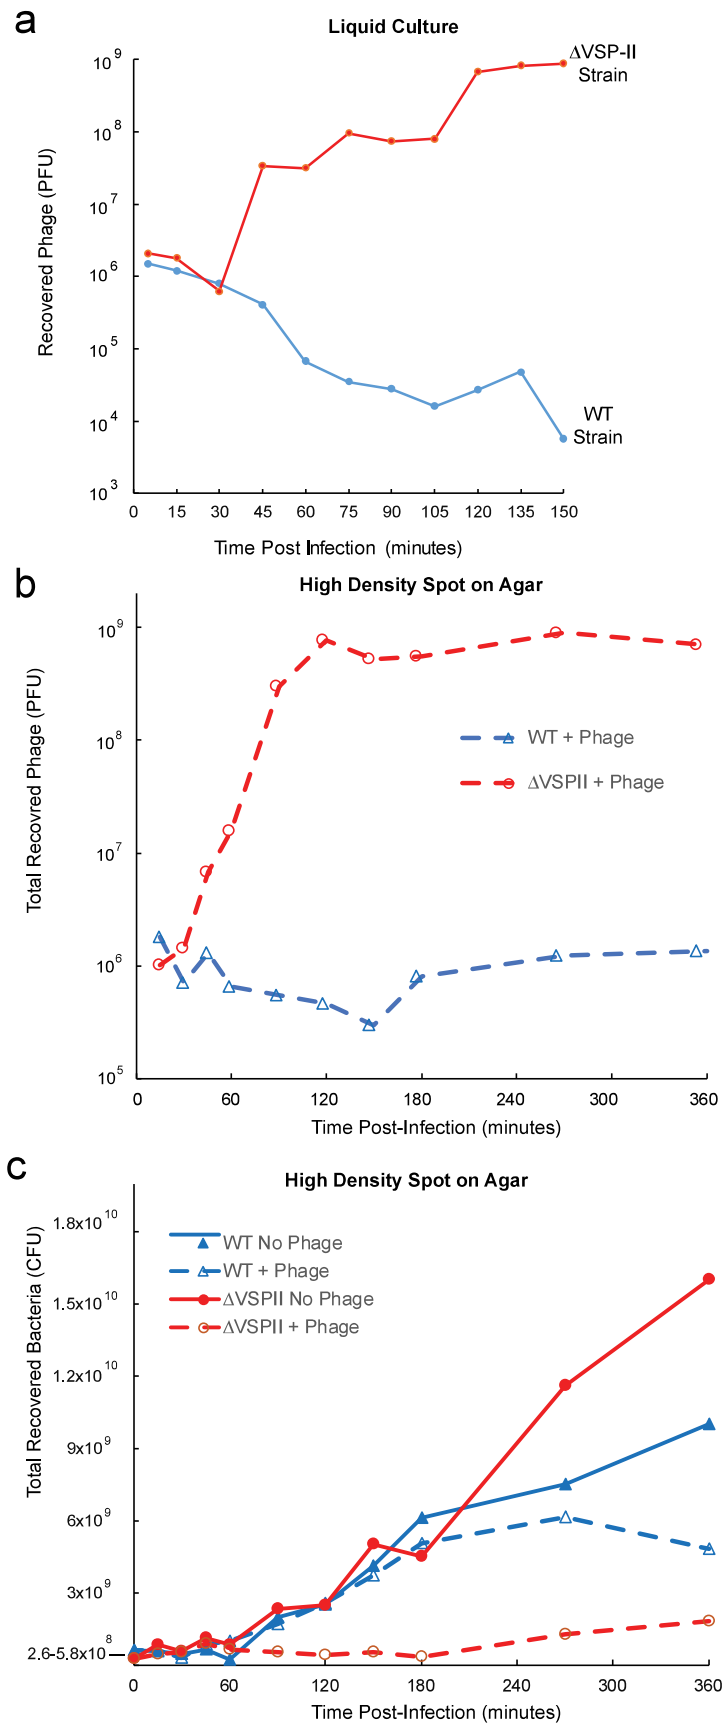

Figure 6

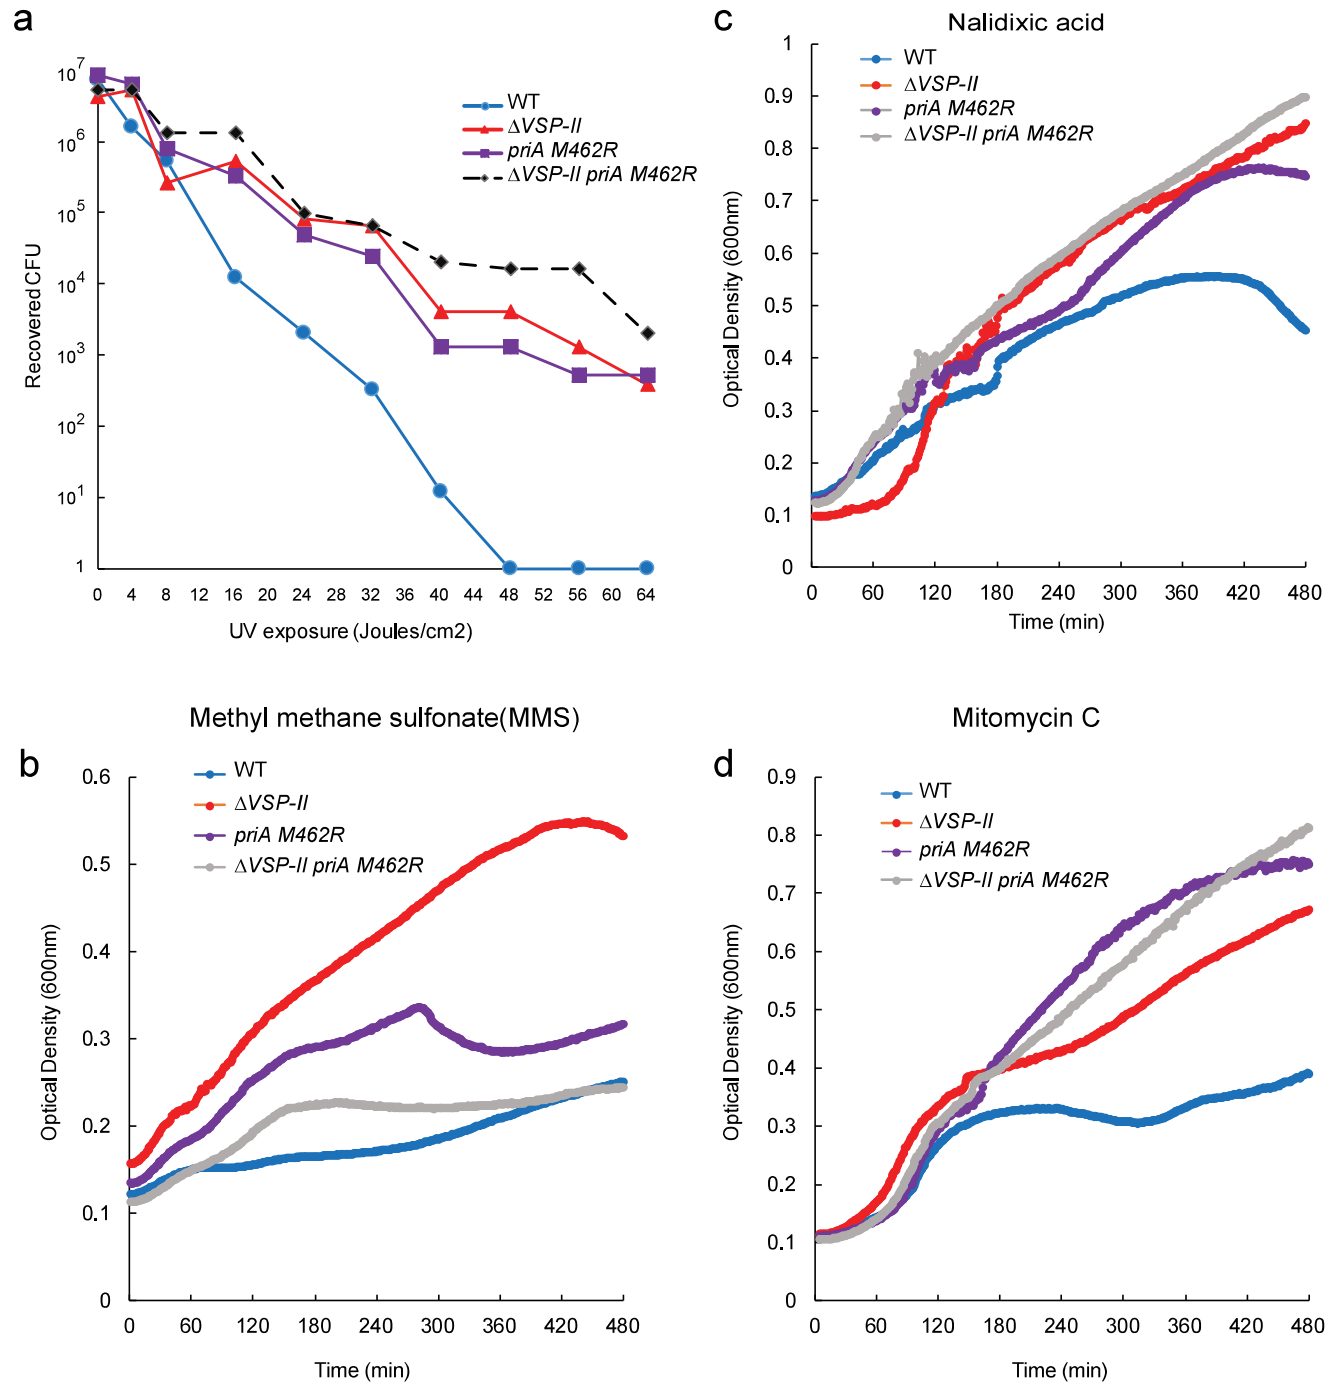

Figure 7

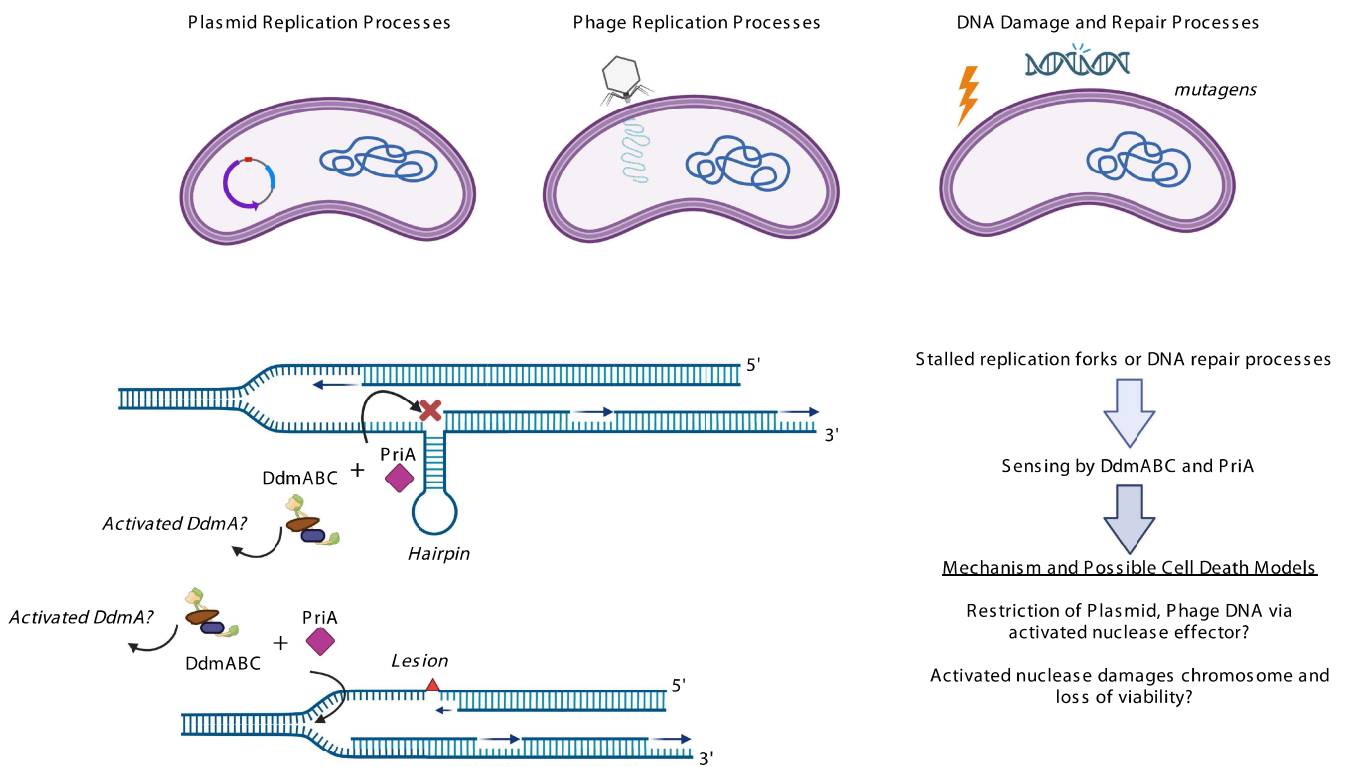

**Table 1**

| <u>Strain</u>                                    | <u>pWR1566 Copy Number</u> | <u>Phage Titer (VIB04)</u> |
|--------------------------------------------------|----------------------------|----------------------------|
| WPR2700                                          | N/A                        | <10                        |
| $\Delta$ VSP-2                                   | N/A                        | $5.6 \times 10^8$          |
| $\Delta$ VSP-2 <i>priA Met462Arg</i>             | N/A                        | $6.6 \times 10^8$          |
| <i>ddmA Ile237::OrfAB</i>                        | 36                         | <10                        |
| <i>ddmA Asp250Tyr</i>                            | 42                         | <10                        |
| <i>ddmA <math>\Delta</math>287-317frameshift</i> | 80                         | <10                        |
| <i>ddmB Trp21stop</i>                            | 80                         | <10                        |
| <i>ddmB Pro94frameshift</i>                      | 76                         | <10                        |
| <i>ddmB Arg100stop</i>                           | 55                         | $6.3 \times 10^8$          |
| <i>ddmB Arg160frameshift</i>                     | 44                         | <10                        |
| <i>ddmC Cys50Phe</i>                             | 43                         | <10                        |
| <i>ddmC Leu125Pro</i>                            | 27                         | <10                        |
| <i>ddmC Arg148frameshift</i>                     | 72                         | <10                        |
| <i>ddmC Lys159stop</i>                           | 10                         | <10                        |
| <i>ddmC Gln162Lys</i>                            | 54                         | <10                        |
| <i>ddmC Asn197frameshift</i>                     | 38                         | <10                        |
| <i>ddmC Ile255Ser</i>                            | 80                         | <10                        |
| <i>ddmC Lys412Glu</i>                            | 33                         | <10                        |
| <i>ddmC Thr513::OrfAB</i>                        | 25                         | <10                        |
| <i>ddmC Asp523Tyr</i>                            | 82                         | $6.3 \times 10^8$          |
| <i>ddmC Phe571Cys</i>                            | 9                          | $6.8 \times 10^8$          |
| <i>luxO Met87Arg</i>                             | 40                         | $5.8 \times 10^8$          |
| <i>pcnB <math>\Delta</math>287-457frameshift</i> | 1                          | <10                        |
| <i>pcnB Ile34del</i>                             | 12                         | <10                        |
| <i>pcnB Asp230frameshift</i>                     | 5                          | <10                        |
| <i>pcnB Trp364stop</i>                           | 0.25                       | <10                        |
| <i>priA Met462Arg</i>                            | 5.5                        | $7.4 \times 10^8$          |
